# Supplementary material for: Hydroxy- and alkoxy-bridged dinuclear uranyl–Schiff base complexes: hydrolysis, transamination and extraction studies
Source: Royal Society of Chemistry journal article supplement (doi:10.1039/b800469b), 2008-01-01
Supplement: b800469b.pdf [file b800469b.pdf]

## Supporting Information for

### Hydroxy- and alkoxy-bridged dinuclear uranyl Schiff base complexes: Hydrolysis, transamination and extraction studies

Mohan S. Bharara, Kathryn Heflin, Stephen, Tonks, Kara Strawbridge, and  
Anne E. V. Gorden\*

Department of Chemistry and Biochemistry, University of Auburn, AL, 36849.

Email: gordeae@auburn.edu

#### Table of Content

|                                                          |    |
|----------------------------------------------------------|----|
| 1) Experimental section                                  | S2 |
| 2) Crystal data for <b>1</b> and <b>2</b>                | S3 |
| 3) Selected bond distances (Å) for <b>1</b> and <b>2</b> | S4 |
| 4) Selected bond angles (°) for <b>1</b> and <b>2</b>    | S5 |
| 4) Packing of <b>1</b> along the 'b' axis                | S6 |
| 5) Packing of <b>2</b> along the 'c' axis                | S6 |
| 6) Hydrolysis profile of H <sub>3</sub> L2               | S7 |
| 7) Hydrolysis profile of <b>4</b>                        | S7 |
| 8) Hydrolysis profile of <b>6</b>                        | S8 |
| 9) References                                            | S8 |

### Experimental Section:

**X-ray Crystallography:** Crystals of **1**·(DMF)<sub>2</sub> and **2**·(DMF)<sub>2</sub> were obtained in good yield from DMF at room temperature. Quality crystals could also be obtained from d<sub>6</sub>-DMSO as **1**·(DMSO)<sub>2</sub> and **2**·(DMSO)<sub>2</sub>. X-ray diffraction data were collected at -80 °C on a Bruker SMART APEX CCD X-ray diffractometer unit using Mo-K $\alpha$  radiation from crystals mounted in Paratone-N oil on glass fibers. SMART (v 5.624) was used for preliminary determination of cell constants and data collection control. Determination of integrated intensities and global cell refinement were performed with the Bruker SAINT Software package using a narrow-frame integration algorithm. The program suite SHELXTL (v 5.1) was used for space group determination, structure solution, and refinement.<sup>1</sup> Refinement was performed against F<sup>2</sup> by weighted full-matrix least square, and empirical absorption corrections (SADABS<sup>2</sup>) were applied. The *tert*-butyl groups on **2b** molecule are disordered over two (60 and 40 %) and restraints were applied to make chemically equivalent bonds approximately equal in the disordered fragments. H atoms were placed at calculated positions using suitable riding models with isotropic displacement parameters derived from their carrier atoms. Crystal data, selected bond distances and angles, are provided in Tables 1 - 3. Crystallography data for structural analysis of compounds **1**·(DMF)<sub>2</sub> and **2**·(DMF)<sub>2</sub> have been deposited with the Cambridge Crystallographic Data Center as CCDC nos. 656874 and 662434, respectively. Copies of this information may be obtained free of charge from The Director, CCDC, 12 Union Road, Cambridge CB2 1EZ, U. K. (phone + 44 1223 336408; fax + 44 1223 336033).

Table S1. Crystal Data for **1**·(DMF)<sub>2</sub> and **2**·(DMF)<sub>2</sub>.

| Compounds                                       | <b>1</b> ·(DMF) <sub>2</sub>                                                  | <b>2</b> ·(DMF) <sub>2</sub>                                                    |
|-------------------------------------------------|-------------------------------------------------------------------------------|---------------------------------------------------------------------------------|
| Empirical formula                               | C <sub>23</sub> H <sub>30</sub> N <sub>4</sub> O <sub>10</sub> U <sub>2</sub> | C <sub>87</sub> H <sub>143</sub> N <sub>11</sub> O <sub>23</sub> U <sub>4</sub> |
| Fw                                              | 998.57                                                                        | 2663.240                                                                        |
| Wavelength (Å)                                  | 0.71073                                                                       | 0.71073                                                                         |
| Crys syst                                       | Monoclinic                                                                    | Triclinic                                                                       |
| Space group                                     | P 21/n                                                                        | P-1                                                                             |
| a (Å)                                           | 11.797(3)                                                                     | 16.636(2)                                                                       |
| b (Å)                                           | 9.784(2)                                                                      | 16.641(2)                                                                       |
| c (Å)                                           | 24.594(5)                                                                     | 20.421(3)                                                                       |
| α (deg)                                         | 90.00                                                                         | 104.963(3)                                                                      |
| β (deg)                                         | 94.811(4)                                                                     | 93.128(3)                                                                       |
| γ (deg)                                         | 90.00                                                                         | 103.839(3)                                                                      |
| V (Å <sup>3</sup> )                             | 2828.7(1)                                                                     | 5262.2(1)                                                                       |
| Z                                               | 4                                                                             | 2                                                                               |
| density calcd (mg/m <sup>3</sup> )              | 2.345                                                                         | 1.682                                                                           |
| abs coeff (mm <sup>-1</sup> )                   | 11.495                                                                        | 6.205                                                                           |
| F(000)                                          | 1840                                                                          | 2588                                                                            |
| Cryst size (mm <sup>3</sup> )                   | 0.1x0.1x0.05                                                                  | 0.1x0.5x0.05                                                                    |
| Reflns collected                                | 18601                                                                         | 36319                                                                           |
| Indep reflns                                    | 4058 (R <sub>int</sub> = 0.0687)                                              | 15175 (R <sub>int</sub> = 0.1222)                                               |
| Refinements method                              | Full-matrix least squares on F <sup>2</sup>                                   | Full-matrix least squares on F <sup>2</sup>                                     |
| GOF of F <sup>2</sup>                           | 0.858                                                                         | 0.868                                                                           |
| Final R indices [I>2σ(I)]                       | R <sub>1</sub> = 0.0272, wR <sub>2</sub> = 0.0539                             | R <sub>1</sub> = 0.0451, wR <sub>2</sub> = 0.901                                |
| R indices (all data)                            | R <sub>1</sub> = 0.0364, wR <sub>2</sub> = 0.0557                             | R <sub>1</sub> = 0.0686, wR <sub>2</sub> = 0.967                                |
| Largest diff peak and hole (e/ Å <sup>3</sup> ) | 1.177 and -0.691                                                              | 1.811 and -1.632                                                                |

Table S2. Selected bond distances for **1**·(DMF)<sub>2</sub> and **2**·(DMF)<sub>2</sub>.

| Bond distances of <b>1</b> ·(DMF) <sub>2</sub> (Å) |           |         |           |
|----------------------------------------------------|-----------|---------|-----------|
| U1-O1                                              | 1.792(4)  | U1-O2   | 1.783(4)  |
| U1-O6                                              | 2.241(5)  | U1-O7   | 2.380(5)  |
| U1-O8                                              | 2.327(4)  | U1-N1   | 2.544(5)  |
| U2-O3                                              | 1.778(4)  | U2-O4   | 1.794(4)  |
| U2-O5                                              | 2.235(5)  | U2-O7   | 2.364(4)  |
| U2-O8                                              | 2.343(4)  | U2-N2   | 2.579(5)  |
| U2-O1D1                                            | 2.400(5)  | U1-O1D2 | 2.461(4)  |
| N1-C10                                             | 1.473(8)  | N1-C11  | 1.272(8)  |
| N2-C2                                              | 1.468(8)  | N2-C3   | 1.286(8)  |
| U1-U2                                              | 3.8693(8) |         |           |
| Bond distances of <b>2</b> ·(DMF) <sub>2</sub> (Å) |           |         |           |
| U1-O1                                              | 1.762(6)  | U1-O2   | 1.785(6)  |
| U1-O5                                              | 2.221(6)  | U1-O6   | 2.383(6)  |
| U1-O8                                              | 2.389(6)  | U1-N1   | 2.541(7)  |
| U2-O3                                              | 1.766(6)  | U2-O4   | 1.776(6)  |
| U2-O6                                              | 2.341(6)  | U2-O7   | 2.254(6)  |
| U2-O8                                              | 2.375(6)  | U2-N2   | 2.558(7)  |
| U1-U2                                              | 3.9340(7) | U3-O9   | 1.774(6)  |
| U3-O10                                             | 1.767(6)  | U3-O13  | 2.227(6)  |
| U3-O14                                             | 2.392(6)  | U3-O16  | 2.341(6)  |
| U3-N3                                              | 2.549(7)  | U4-O11  | 1.764(6)  |
| U4-O12                                             | 1.796(6)  | U4-O14  | 2.352(6)  |
| U4-O15                                             | 2.239(6)  | U4-O16  | 2.338(6)  |
| U4-N4                                              | 2.561(7)  | U3-U4   | 3.8470(6) |

Table S3. Selected bond angles for **1**·(DMF)<sub>2</sub> and **2**·(DMF)<sub>2</sub>.

| Bond angles of <b>1</b> ·(DMF) <sub>2</sub> (deg) |           |            |           |
|---------------------------------------------------|-----------|------------|-----------|
| O1-U1-O2                                          | 178.7(2)  | O1-U1-O6   | 90.76(2)  |
| O2-U1-O8                                          | 91.90(2)  | O6-U1-O8   | 154.81(2) |
| O7-U1-O8                                          | 68.84(2)  | O3-U2-O4   | 179.5(2)  |
| Bond angles of <b>2</b> ·(DMF) <sub>2</sub> (deg) |           |            |           |
| O1-U1-O2                                          | 179.0(3)  | O1-U1-O5   | 88.0(3)   |
| O1-U1-O6-                                         | 91.3(3)   | O1-U1-O8   | 87.8(2)   |
| O2-U1-O5                                          | 91.1(3)   | O2-U1-O6   | 89.6(3)   |
| O2-U1-O8                                          | 92.9(2)   | O3-U2-O4   | 179.5(3)  |
| O3-U2-O6                                          | 90.8(3)   | O3-U2-O7   | 89.5(3)   |
| O3-U2-O8                                          | 88.9(3)   | O4-U2-O6   | 88.7(2)   |
| O4-U2-O7                                          | 90.9(3)   | O4-U2-O8   | 90.9(2)   |
| O6-U2-O7                                          | 136.0(2)  | O6-U2-O8   | 68.38(19) |
| O7-U2-O8                                          | 155.6(2)  | O9-U3-O10  | 178.4(3)  |
| O9-U3-O13                                         | 92.4(3)   | O9-U3-O14  | 88.0(2)   |
| O9-U3-O16                                         | 94.1(3)   | O10-U3-O13 | 86.8(3)   |
| O10-U3-O14                                        | 91.6(2)   | O10-U3-O16 | 87.1(3)   |
| O13-U3-O16                                        | 155.4(2)  | O13-U3-O14 | 135.8(2)  |
| O14-U3-O16                                        | 68.25(19) |            |           |

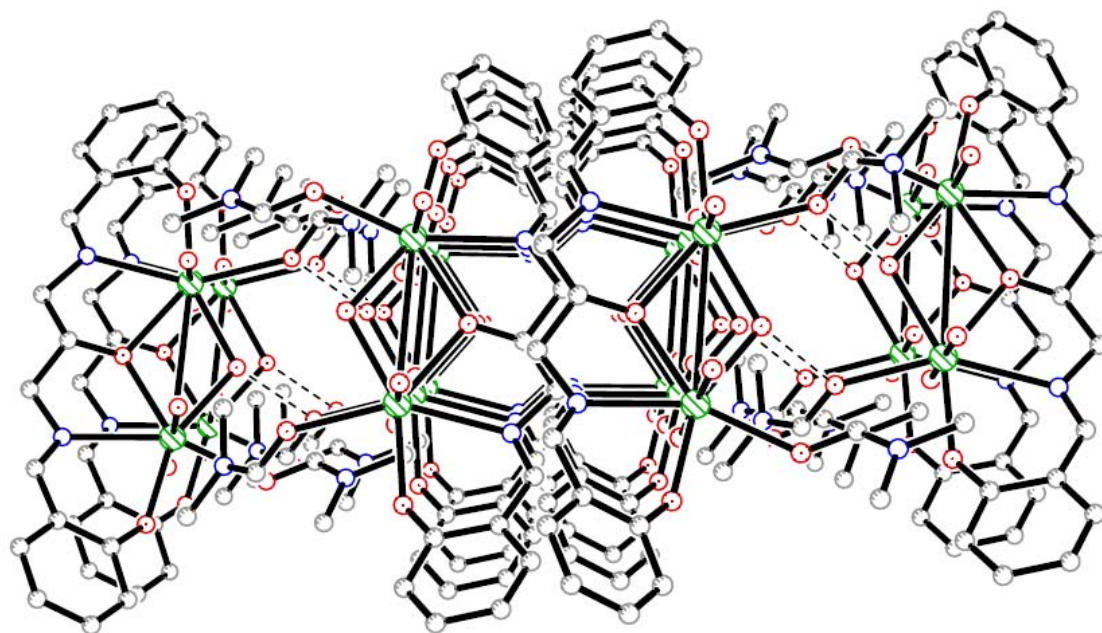

Fig S1. Packing diagram of **1** along the 'b' axis.

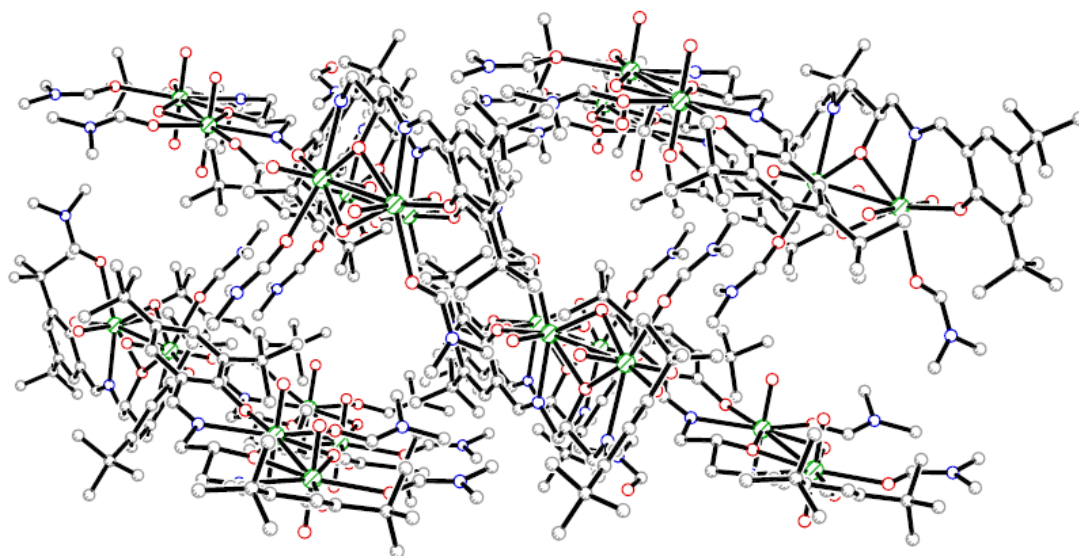

Fig S2. Packing diagram of **2** along the 'c' axis.

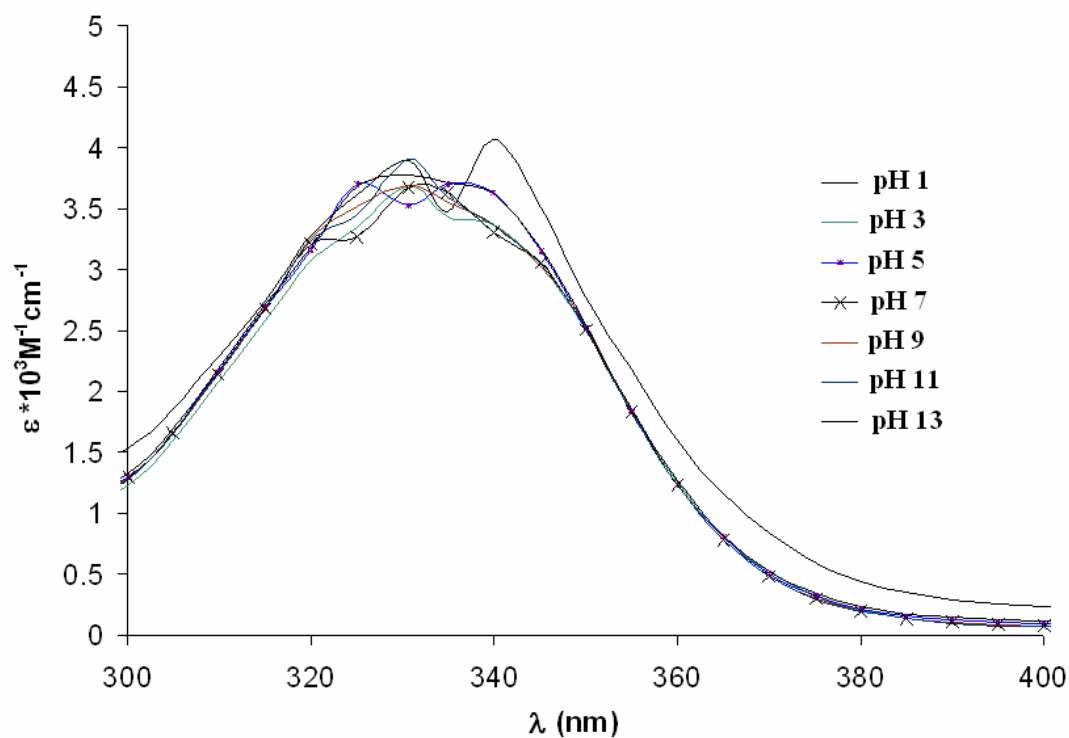

Fig S3. Hydrolysis profile of H<sub>3</sub>L<sub>2</sub>.

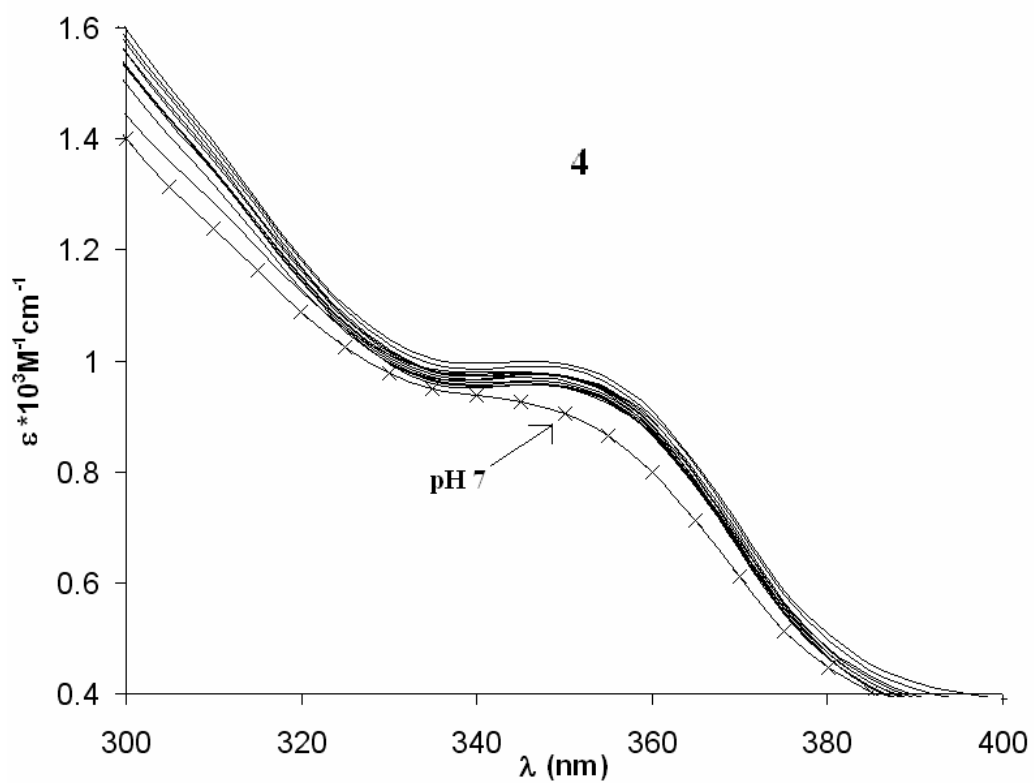

Fig S4. Hydrolysis profile of compound **4** (0.1 mM) dissolved in CHCl<sub>3</sub>.

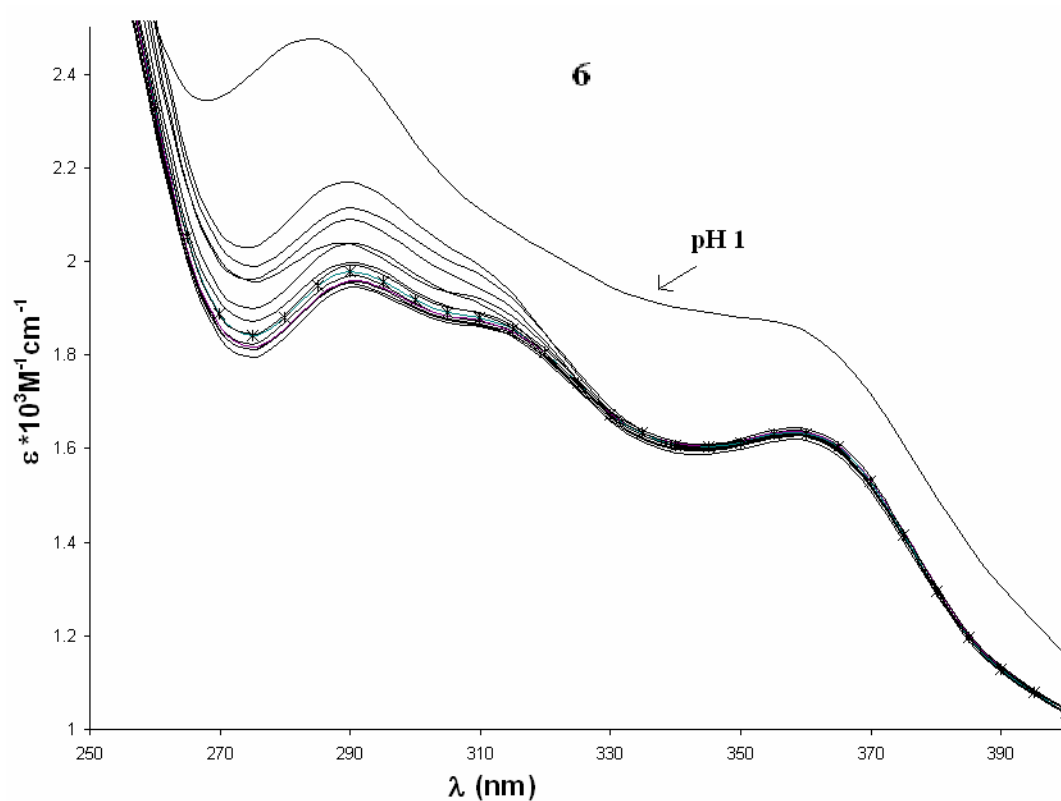

Fig S5. Hydrolysis profile of compound **6** (0.1 mM) dissolved in CHCl<sub>3</sub>.

References:

- <sup>1</sup> G. M. Sheldrick, 'SHELXTL PC, version 6.12, An Integrated System for Solving, Refining, and Displaying Crystal Structures from Diffraction Data; Siemens Analytical X-ray Instruments, Inc', 2001.
- <sup>2</sup> G. M. Sheldrick, 'SADABS-An empirical absorption correction program; Bruker Analytical X-ray Systems ', 1996.
